Published by

THE AMERICAN  
SOCIETY FOR  
CELL  
BIOLOGY

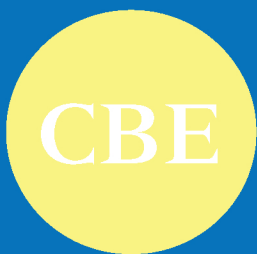

# Life Sciences Education

## Science Faculty with Education Specialties

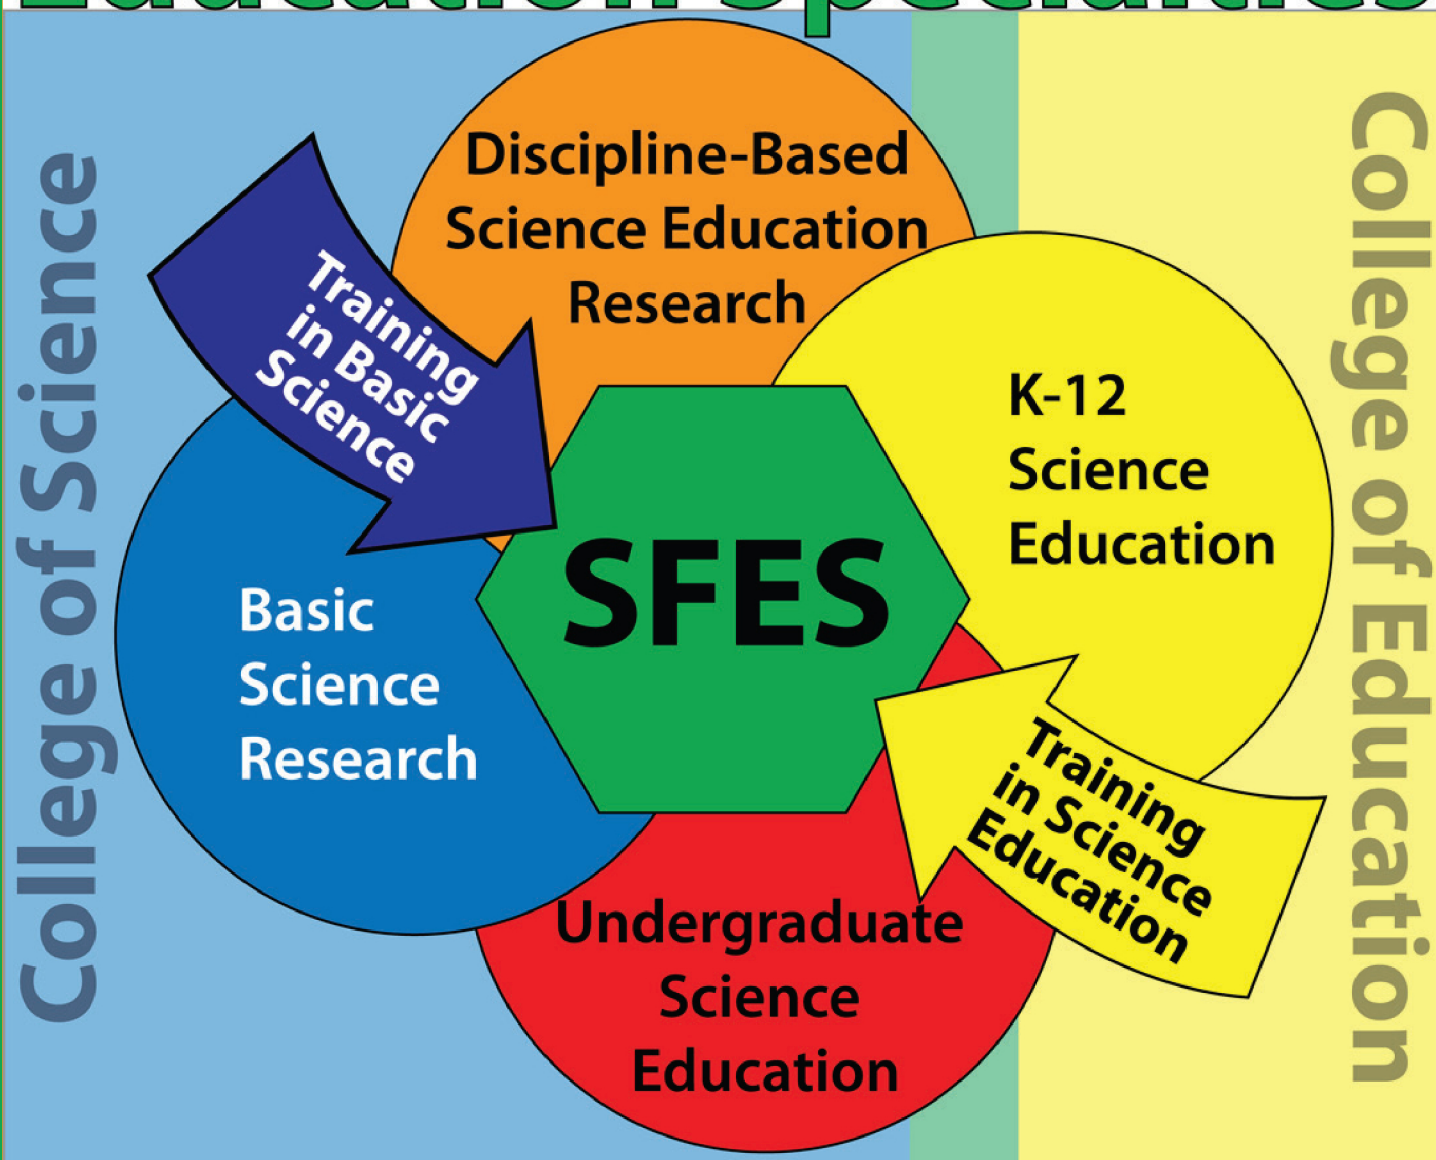

Source: https://www.lifescied.org/doi/suppl/10.1187/lse.2011.10.issue-1/suppl_file/front.pdf
